# Supplementary material for: Feasibility of Pre‐Hospital Resuscitative Endovascular Balloon Occlusion of the Aorta in Non‐Traumatic Out‐of‐Hospital Cardiac Arrest
Source: PubMed Central journal article supplement — J Am Heart Assoc. 2019 Nov 11;8(22):e014394. doi: 10.1161/JAHA.119.014394 (PMC6915259; doi:10.1161/jaha.119.014394), 2019-11-11
Supplement: JAH3-8-e014394-s001.pdf [file JAH3-8-e014394-s001.pdf]

# **SUPPLEMENTAL MATERIAL**

**Table S1. PROCEDURE FOR INSERTION OF REBOA FOR OHCA**

Abort procedure if technical problems like:

- severe difficulties in ultrasound (US) visualization of the artery or cannulation
- resistance when inserting guidewire, introducer or catheter
- severe bleeding
- time consuming procedure

| PHYSICIAN                                                                                                                                                                                                                                                                                                                                                                                                                                                                                                                                                                                                                                                                                                                                                                                                                                                                                                                                                                                                                                                                                     | PARAMEDIC                                                                                                                                                                                                                                                                                                                                                                                                                                                                                                                                                                                                                                                                                                                                                                                                                                                                                                                                                                                                                                                                                                                                                                      |
|-----------------------------------------------------------------------------------------------------------------------------------------------------------------------------------------------------------------------------------------------------------------------------------------------------------------------------------------------------------------------------------------------------------------------------------------------------------------------------------------------------------------------------------------------------------------------------------------------------------------------------------------------------------------------------------------------------------------------------------------------------------------------------------------------------------------------------------------------------------------------------------------------------------------------------------------------------------------------------------------------------------------------------------------------------------------------------------------------|--------------------------------------------------------------------------------------------------------------------------------------------------------------------------------------------------------------------------------------------------------------------------------------------------------------------------------------------------------------------------------------------------------------------------------------------------------------------------------------------------------------------------------------------------------------------------------------------------------------------------------------------------------------------------------------------------------------------------------------------------------------------------------------------------------------------------------------------------------------------------------------------------------------------------------------------------------------------------------------------------------------------------------------------------------------------------------------------------------------------------------------------------------------------------------|
| <ol style="list-style-type: none"> <li>1. Cut clothes from knee to groin</li> <li>2. Examine with US – store image</li> <li>3. Note EtCO<sub>2</sub></li> <li>4. Fill NaCl in wash tray</li> <li>5. Apply Chlorhexidine on compresses</li> <li>6. Wash selected area with forceps and compresses</li> <li>7. Fill gel into the US-cover – place it on the US-probe</li> <li>8. Apply US-gel on the thigh</li> <li>9. US-guided cannulation of a. femoralis</li> <li>10. Insert guidewire into cannulation needle, 60 cm</li> <li>11. Remove needle – make skin incision with scalpel</li> <li>12. Record US-video of guidewire in a. femoralis</li> <li>13. Insert introducer – remove dilatator</li> <li>14. Insert balloon-catheter, 50 cm</li> <li>15. Check pulse - LEFT a. radialis</li> <li>16. Fill balloon with 15 ml NaCl</li> <li>17. Check pulse in LEFT a. radialis</li> <li>18. Note time for balloon inflation and EtCO<sub>2</sub></li> <li>19. Suture and fixate</li> <li>20. Place adhesive cover over REBOA-equipment</li> <li>21. Secure guidewire with forceps</li> </ol> | <ol style="list-style-type: none"> <li>1. Open kit – unpack – place sterile gloves for physician</li> <li>2. Place introducer and balloon-catheter on sterile cloth</li> <li>3. Prepare NaCl and Chlorhexidine – close to physician</li> <li>4. Put on sterile gloves</li> <li>5. Aspirate 15 ml NaCl from wash tray in 20 ml syringe</li> <li>6. Hand physician forceps – place compresses on sterile cloth</li> <li>7. Apply sterile drape</li> <li>8. Prepare US-cover</li> <li>9. Apply elastic band – place probe on the sterile drape</li> <li>10. Prepare needle with 5 ml syringe</li> <li>11. Ready guidewire</li> <li>12. Hand physician soft end of guidewire, insert to 60 cm</li> <li>13. Hand scalpel to physician</li> <li>14. Mount introducer and dilatator onto guidewire</li> <li>15. Control the guidewire</li> <li>16. Ready balloon-catheter</li> <li>17. Put stopcock on blue line</li> <li>18. Put plug on the black line</li> <li>19. Hand physician 20 ml syringe with 15 ml NaCl</li> <li>20. Ready suture – needle-holder – scalpel</li> <li>21. Cut suture</li> <li>22. Ready adhesive cover</li> <li>23. Cut and remove sterile drape</li> </ol> |

**Table S2.**

**Checklist REBOA**

**ID number**

**Date**

**Patient**

**Time**

|                          |  |
|--------------------------|--|
| Arrival at patient       |  |
| Start of REBOA procedure |  |
| Occlusion of aorta       |  |
| Deflation of balloon     |  |

**EtCO2**

|                           |  |
|---------------------------|--|
| Before occlusion of aorta |  |
| After occlusion of aorta  |  |
| after 30 seconds          |  |
| after 60 seconds          |  |
| after 90 seconds          |  |
| After ROSC                |  |

**Arterial blood gas after admission to hospital**

|           |  |
|-----------|--|
| pH        |  |
| BE        |  |
| s-Lactate |  |
| s-K       |  |

**Physicians comments**

|  |
|--|
|  |
|--|

**Inclusion criteria**

**Yes**

**No**

|                                               |  |  |
|-----------------------------------------------|--|--|
| Non-traumatic cardiac arrest                  |  |  |
| Age 18-75 years                               |  |  |
| Less than 10 min from arrest to bystander CPR |  |  |
| Pregnant                                      |  |  |
| Suspected cerebral catastrophe as etiology    |  |  |
| End stage terminal illness                    |  |  |
| Hypothermic, incl drownings                   |  |  |
| Strangulation                                 |  |  |

**Yes**

**No**

|                                                       |  |  |
|-------------------------------------------------------|--|--|
| Palpable pulse in left radial artery before occlusion |  |  |
| Palpable pulse in left radial artery after occlusion  |  |  |

**Yes**

**No**

|                                     |  |  |
|-------------------------------------|--|--|
| Did the procedure interrupt the CPR |  |  |
|-------------------------------------|--|--|

**Easy**

**Medium**

**Impossible**

|                                       |  |  |  |
|---------------------------------------|--|--|--|
| Ease of access to patient             |  |  |  |
| Ease of visualisation with ultrasound |  |  |  |
| Ease of cannulation                   |  |  |  |
| Ease of insertion of guidewire        |  |  |  |
| Ease of insertion of introducer       |  |  |  |
| Ease of REBOA insertion               |  |  |  |
